# Supplementary material
Source: publisher figshare collection journal article supplement (https://acs.figshare.com/ndownloader/files/3936844)
Supplement: Supplementary file 1 [file 3936844]

data_aa

# SUBMISSION DETAILS

_publ_contact_author_name          'Banglin Chen'
_publ_contact_author_address
; 
Department of Chemistry,
University of Texas at San Antonio, 
San Antonio, Texas 78249-0698
Unite States
;
_publ_contact_author_email         'banglin.chen@utsa.edu'
_publ_contact_author_fax           ?
_publ_contact_author_phone         ?
_publ_requested_journal            'Cryst. Growth Des.'


# TITLE AND AUTHOR LIST
_publ_section_title
;
?
;
_publ_author_name       
;
hailong Wang
;    
data_qq 
 
_audit_creation_method            SHELXL-97 
_chemical_name_systematic 
; 
 ? 
; 
_chemical_name_common             ? 
_chemical_melting_point           ? 
_chemical_formula_moiety          'C50 H36 N2 O10 Zn2, C6 H14 N2 O2, O2'
_chemical_formula_sum 
 'C56 H50 N4 O14 Zn2' 
_chemical_formula_weight          1133.74 
 
loop_ 
 _atom_type_symbol 
 _atom_type_description 
 _atom_type_scat_dispersion_real 
 _atom_type_scat_dispersion_imag 
 _atom_type_scat_source 
 'C'  'C'   0.0033   0.0016 
 'International Tables Vol C Tables 4.2.6.8 and 6.1.1.4' 
 'H'  'H'   0.0000   0.0000 
 'International Tables Vol C Tables 4.2.6.8 and 6.1.1.4' 
 'N'  'N'   0.0061   0.0033 
 'International Tables Vol C Tables 4.2.6.8 and 6.1.1.4' 
 'O'  'O'   0.0106   0.0060 
 'International Tables Vol C Tables 4.2.6.8 and 6.1.1.4' 
 'Zn'  'Zn'   0.2839   1.4301 
 'International Tables Vol C Tables 4.2.6.8 and 6.1.1.4' 
 
_symmetry_cell_setting            monoclinic
_symmetry_space_group_name_H-M    'P 2/c'
_symmetry_space_group_name_Hall   '-P 2yc'
 
 
loop_ 
 _symmetry_equiv_pos_as_xyz 
 'x, y, z' 
 '-x, y, -z+1/2' 
 '-x, -y, -z' 
 'x, -y, z-1/2' 
 
_cell_length_a                    17.053(6) 
_cell_length_b                    11.363(4) 
_cell_length_c                    18.518(6) 
_cell_angle_alpha                 90.00 
_cell_angle_beta                  116.226(4) 
_cell_angle_gamma                 90.00 
_cell_volume                      3219.0(18) 
_cell_formula_units_Z             2 
_cell_measurement_temperature     98(2) 
_cell_measurement_reflns_used     5879 
_cell_measurement_theta_min       2.36 
_cell_measurement_theta_max       28.97 
 
_exptl_crystal_description        block
_exptl_crystal_colour             yellow 
_exptl_crystal_size_max           0.20 
_exptl_crystal_size_mid           0.15 
_exptl_crystal_size_min           0.10 
_exptl_crystal_density_meas       ? 
_exptl_crystal_density_diffrn     1.170 
_exptl_crystal_density_method     'not measured' 
_exptl_crystal_F_000              1172 
_exptl_absorpt_coefficient_mu     0.803 
_exptl_absorpt_correction_type     'multi-scan'  
_exptl_absorpt_correction_T_min    0.865 
_exptl_absorpt_correction_T_max   0.923  
_exptl_absorpt_process_details    ? 
 
_exptl_special_details 
; 
 ? 
; 
 
_diffrn_ambient_temperature       98(2) 
_diffrn_radiation_wavelength      0.71073 
_diffrn_radiation_type            MoK\a 
_diffrn_radiation_source          'fine-focus sealed tube' 
_diffrn_radiation_monochromator   graphite 
_diffrn_measurement_device_type   'Rigaku AFC12/Saturn 724 CCD' 
_diffrn_measurement_method        '\w scans'
_diffrn_detector_area_resol_mean  16.2141
_diffrn_standards_number          0
_diffrn_standards_interval_count  0
_diffrn_standards_interval_time   0 
_diffrn_standards_decay_%         ? 
_diffrn_reflns_number             19813 
_diffrn_reflns_av_R_equivalents   0.0459 
_diffrn_reflns_av_sigmaI/netI     0.0373 
_diffrn_reflns_limit_h_min        -20 
_diffrn_reflns_limit_h_max        17 
_diffrn_reflns_limit_k_min        -13 
_diffrn_reflns_limit_k_max        13 
_diffrn_reflns_limit_l_min        -14 
_diffrn_reflns_limit_l_max        22 
_diffrn_reflns_theta_min          1.79 
_diffrn_reflns_theta_max          25.00 
_reflns_number_total              5629 
_reflns_number_gt                 5199 
_reflns_threshold_expression      >2sigma(I) 
 
_computing_data_collection        ? 
_computing_cell_refinement        ? 
_computing_data_reduction         ? 
_computing_structure_solution     'SHELXS-97 (Sheldrick, 1990)' 
_computing_structure_refinement   'SHELXL-97 (Sheldrick, 1997)' 
_computing_molecular_graphics     ? 
_computing_publication_material   ? 
 
_refine_special_details 
; 
 Refinement of F^2^ against ALL reflections.  The weighted R-factor wR and 
 goodness of fit S are based on F^2^, conventional R-factors R are based 
 on F, with F set to zero for negative F^2^. The threshold expression of 
 F^2^ > 2sigma(F^2^) is used only for calculating R-factors(gt) etc. and is 
 not relevant to the choice of reflections for refinement.  R-factors based 
 on F^2^ are statistically about twice as large as those based on F, and R- 
 factors based on ALL data will be even larger. 
; 
 
_refine_ls_structure_factor_coef  Fsqd  
_refine_ls_matrix_type            full 
_refine_ls_weighting_scheme       calc  
_refine_ls_weighting_details 
 'calc w=1/[\s^2^(Fo^2^)+(0.2000P)^2^+0.0000P] where P=(Fo^2^+2Fc^2^)/3' 
_atom_sites_solution_primary      direct 
_atom_sites_solution_secondary    difmap 
_atom_sites_solution_hydrogens    geom 
_refine_ls_hydrogen_treatment     mixed 
_refine_ls_extinction_method      none 
_refine_ls_extinction_coef        ? 
_refine_ls_number_reflns          5629 
_refine_ls_number_parameters      357 
_refine_ls_number_restraints      51 
_refine_ls_R_factor_all           0.1139 
_refine_ls_R_factor_gt            0.1088 
_refine_ls_wR_factor_ref          0.3606 
_refine_ls_wR_factor_gt           0.3484 
_refine_ls_goodness_of_fit_ref    1.650 
_refine_ls_restrained_S_all       1.663 
_refine_ls_shift/su_max           0.021 
_refine_ls_shift/su_mean          0.003 
 
loop_ 
 _atom_site_label 
 _atom_site_type_symbol 
 _atom_site_fract_x 
 _atom_site_fract_y 
 _atom_site_fract_z 
 _atom_site_U_iso_or_equiv 
 _atom_site_adp_type 
 _atom_site_occupancy 
 _atom_site_symmetry_multiplicity 
 _atom_site_calc_flag 
 _atom_site_refinement_flags 
 _atom_site_disorder_assembly 
 _atom_site_disorder_group 
C1 C 0.1399(3) 0.6237(5) 0.5640(4) 0.0296(12) Uani 1 1 d . . . 
C2 C 0.2273(3) 0.6861(5) 0.6013(3) 0.0277(11) Uani 1 1 d . . . 
C3 C 0.2881(4) 0.6588(5) 0.6779(3) 0.0328(12) Uani 1 1 d . . . 
H3 H 0.2755 0.6028 0.7078 0.039 Uiso 1 1 calc R . . 
C4 C 0.3698(4) 0.7161(6) 0.7109(3) 0.0379(13) Uani 1 1 d . . . 
H4 H 0.4108 0.6995 0.7632 0.046 Uiso 1 1 calc R . . 
C5 C 0.3884(4) 0.7964(6) 0.6654(3) 0.0383(13) Uani 1 1 d . . . 
H5 H 0.4427 0.8331 0.6877 0.046 Uiso 1 1 calc R . . 
C6 C 0.3286(3) 0.8251(5) 0.5868(3) 0.0284(11) Uani 1 1 d . . . 
C7 C 0.2466(3) 0.7719(5) 0.5558(3) 0.0262(11) Uani 1 1 d . . . 
H7 H 0.2042 0.7928 0.5049 0.031 Uiso 1 1 calc R . . 
C8 C 0.2435(3) 1.1761(5) 0.4088(4) 0.0349(13) Uani 1 1 d . . . 
C9 C 0.2268(4) 1.2058(7) 0.3302(4) 0.0438(15) Uani 1 1 d . . . 
H9 H 0.2580 1.1690 0.3063 0.053 Uiso 1 1 calc R . . 
C10 C 0.1637(4) 1.2904(8) 0.2871(4) 0.055(2) Uani 1 1 d . . . 
H10 H 0.1542 1.3101 0.2351 0.067 Uiso 1 1 calc R . . 
C11 C 0.1159(4) 1.3444(7) 0.3209(5) 0.0516(18) Uani 1 1 d . . . 
H11 H 0.0743 1.4010 0.2922 0.062 Uiso 1 1 calc R . . 
C12 C 0.1304(4) 1.3131(5) 0.3998(4) 0.0362(13) Uani 1 1 d . . . 
C13 C 0.1930(4) 1.2297(5) 0.4427(4) 0.0343(12) Uani 1 1 d . . . 
H13 H 0.2018 1.2091 0.4943 0.041 Uiso 1 1 calc R . . 
C14 C 0.0797(4) 1.3739(6) 0.4381(4) 0.0355(13) Uani 1 1 d . . . 
C15 C 0.4279(4) 1.1917(5) 0.4312(3) 0.0299(11) Uani 1 1 d . . . 
H15 H 0.3914 1.2562 0.4097 0.036 Uiso 1 1 calc R . . 
C16 C 0.3982(4) 1.0941(4) 0.4609(4) 0.0274(12) Uani 1 1 d . . . 
C17 C 0.3118(4) 1.0881(5) 0.4557(4) 0.0295(12) Uani 1 1 d . . . 
C18 C 0.2924(3) 1.0000(5) 0.4962(3) 0.0283(11) Uani 1 1 d . . . 
H18 H 0.2373 0.9998 0.4951 0.034 Uiso 1 1 calc R . . 
C19 C 0.3512(4) 0.9105(4) 0.5389(3) 0.0278(12) Uani 1 1 d . . . 
C20 C 0.4327(3) 0.9076(4) 0.5356(3) 0.0268(11) Uani 1 1 d . . . 
C21 C 0.4567(3) 1.0004(5) 0.4989(3) 0.0261(10) Uani 1 1 d . . . 
C22 C 0.4904(4) 0.8081(5) 0.5660(3) 0.0307(12) Uani 1 1 d . . . 
H22 H 0.4718 0.7423 0.5841 0.037 Uiso 1 1 calc R . . 
C23 C 0.1227(7) 0.2166(9) 0.8152(7) 0.094(3) Uani 1 1 d DU . . 
H23A H 0.1691 0.1721 0.8559 0.141 Uiso 1 1 d R . . 
H23B H 0.0967 0.1713 0.7665 0.141 Uiso 1 1 d R . . 
H23C H 0.0793 0.2346 0.8333 0.141 Uiso 1 1 d R . . 
C24 C 0.2193(8) 0.3832(11) 0.8747(6) 0.092(3) Uani 1 1 d U . . 
H24A H 0.1991 0.3812 0.9156 0.137 Uiso 1 1 d R . . 
H24B H 0.2257 0.4636 0.8622 0.137 Uiso 1 1 d R . . 
H24C H 0.2747 0.3439 0.8940 0.137 Uiso 1 1 d R . . 
C25 C 0.1309(6) 0.3688(7) 0.7313(4) 0.059(2) Uani 1 1 d . . . 
H25 H 0.1555 0.4401 0.7273 0.071 Uiso 1 1 d R . . 
O6B O 0.0830(7) 0.0502(10) 0.9376(9) 0.083(3) Uani 0.539(5) 1 d PD A 2 
O8 O 0.5464(16) 0.501(2) 0.6058(17) 0.137(5) Uiso 0.461(5) 1 d P A 1 
N1 N 0.1574(5) 0.3248(6) 0.8030(4) 0.0646(18) Uani 1 1 d D . . 
N2B N -0.0631(6) 0.0185(10) 0.8855(7) 0.060(2) Uani 0.539(5) 1 d PD A 2 
O1 O 0.1315(3) 0.5383(4) 0.6029(3) 0.0393(10) Uani 1 1 d . . . 
O2 O 0.0841(3) 0.6599(4) 0.4977(3) 0.0396(10) Uani 1 1 d . . . 
O3 O 0.0881(3) 1.3368(4) 0.5041(3) 0.0413(10) Uani 1 1 d . . . 
O4 O 0.0338(3) 1.4599(4) 0.3990(3) 0.0445(11) Uani 1 1 d . . . 
O5 O 0.0785(3) 0.3266(4) 0.6701(3) 0.0427(11) Uani 1 1 d . . . 
Zn1 Zn 0.03282(3) 0.41828(5) 0.56828(3) 0.0254(4) Uani 1 1 d . . . 
C26B C -0.1463(9) 0.0684(19) 0.8721(15) 0.097(5) Uani 0.539(5) 1 d PDU A 2 
H26D H -0.1862 0.0619 0.8161 0.145 Uiso 0.539(5) 1 d PR A 2 
H26E H -0.1387 0.1499 0.8875 0.145 Uiso 0.539(5) 1 d PR A 2 
H26F H -0.1693 0.0267 0.9036 0.145 Uiso 0.539(5) 1 d PR A 2 
C27B C -0.0635(14) -0.0959(12) 0.8527(13) 0.087(4) Uani 0.539(5) 1 d PDU A 2 
H27D H -0.0574 -0.1589 0.8894 0.131 Uiso 0.539(5) 1 d PR A 2 
H27E H -0.0151 -0.0973 0.8393 0.131 Uiso 0.539(5) 1 d PR A 2 
H27F H -0.1171 -0.1055 0.8046 0.131 Uiso 0.539(5) 1 d PR A 2 
C28B C 0.0147(7) 0.0790(11) 0.9335(9) 0.055(3) Uani 0.539(5) 1 d PD A 2 
H28B H 0.0121 0.1443 0.9626 0.066 Uiso 0.539(5) 1 d PR A 2 
N2A N 0.5686(7) 1.1402(11) 0.6877(8) 0.060(2) Uani 0.461(5) 1 d PD A 1 
C28A C 0.6242(8) 1.1914(13) 0.6581(9) 0.055(3) Uani 0.461(5) 1 d PD A 1 
H28A H 0.6053 1.2563 0.6242 0.066 Uiso 0.461(5) 1 d PR A 1 
O6A O 0.6960(8) 1.1515(11) 0.6770(10) 0.083(3) Uani 0.461(5) 1 d PD A 1 
C27A C 0.5959(15) 1.0365(15) 0.7369(13) 0.087(4) Uani 0.461(5) 1 d PDU A 1 
H27A H 0.5957 0.9701 0.7047 0.131 Uiso 0.461(5) 1 d PR A 1 
H27B H 0.5570 1.0216 0.7607 0.131 Uiso 0.461(5) 1 d PR A 1 
H27C H 0.6540 1.0488 0.7786 0.131 Uiso 0.461(5) 1 d PR A 1 
C26A C 0.4811(10) 1.186(2) 0.6600(16) 0.097(5) Uani 0.461(5) 1 d PDU A 1 
H26A H 0.4764 1.2588 0.6318 0.145 Uiso 0.461(5) 1 d PR A 1 
H26B H 0.4699 1.2004 0.7057 0.145 Uiso 0.461(5) 1 d PR A 1 
H26C H 0.4392 1.1309 0.6246 0.145 Uiso 0.461(5) 1 d PR A 1 
O9 O 0.3544(14) 0.466(2) 0.5540(13) 0.137(5) Uiso 0.539(5) 1 d P A 2 
 
loop_ 
 _atom_site_aniso_label 
 _atom_site_aniso_U_11 
 _atom_site_aniso_U_22 
 _atom_site_aniso_U_33 
 _atom_site_aniso_U_23 
 _atom_site_aniso_U_13 
 _atom_site_aniso_U_12 
C1 0.020(2) 0.038(3) 0.040(3) -0.006(2) 0.022(2) -0.003(2) 
C2 0.027(2) 0.033(3) 0.030(3) -0.003(2) 0.019(2) -0.002(2) 
C3 0.032(3) 0.038(3) 0.034(3) -0.005(2) 0.020(2) -0.004(2) 
C4 0.035(3) 0.051(3) 0.028(3) -0.005(3) 0.013(2) -0.009(3) 
C5 0.027(3) 0.055(4) 0.031(3) -0.009(3) 0.011(2) -0.016(3) 
C6 0.026(2) 0.032(3) 0.031(3) -0.004(2) 0.016(2) -0.005(2) 
C7 0.018(2) 0.033(3) 0.033(3) -0.003(2) 0.015(2) -0.005(2) 
C8 0.023(2) 0.046(3) 0.044(3) 0.002(3) 0.022(2) 0.000(2) 
C9 0.031(3) 0.068(4) 0.044(3) 0.010(3) 0.027(3) 0.010(3) 
C10 0.041(3) 0.090(6) 0.049(4) 0.025(4) 0.032(3) 0.024(4) 
C11 0.028(3) 0.072(5) 0.065(4) 0.036(4) 0.029(3) 0.021(3) 
C12 0.032(3) 0.042(3) 0.044(3) 0.005(3) 0.025(3) 0.001(2) 
C13 0.029(3) 0.039(3) 0.040(3) 0.001(3) 0.020(2) 0.003(2) 
C14 0.020(2) 0.038(3) 0.053(4) 0.003(3) 0.021(3) -0.003(2) 
C15 0.027(3) 0.026(3) 0.040(3) 0.001(2) 0.018(2) 0.002(2) 
C16 0.025(3) 0.029(3) 0.039(3) -0.005(2) 0.024(2) -0.0031(19) 
C17 0.023(3) 0.037(3) 0.033(3) -0.003(2) 0.015(2) 0.002(2) 
C18 0.018(2) 0.036(3) 0.037(3) -0.004(2) 0.018(2) 0.002(2) 
C19 0.025(3) 0.033(3) 0.030(3) -0.004(2) 0.016(2) -0.005(2) 
C20 0.022(2) 0.031(3) 0.029(3) -0.005(2) 0.013(2) -0.0063(19) 
C21 0.020(2) 0.032(3) 0.031(3) -0.004(2) 0.0149(19) -0.002(2) 
C22 0.031(3) 0.028(3) 0.039(3) 0.000(2) 0.021(2) -0.003(2) 
C23 0.066(5) 0.117(7) 0.096(6) 0.048(6) 0.032(5) 0.007(5) 
C24 0.110(7) 0.103(6) 0.058(5) -0.008(5) 0.034(5) 0.007(6) 
C25 0.079(5) 0.061(4) 0.040(4) 0.012(3) 0.029(4) 0.034(4) 
O6B 0.080(6) 0.052(4) 0.109(8) -0.014(5) 0.033(6) -0.005(5) 
N1 0.073(4) 0.082(5) 0.045(3) 0.016(3) 0.033(3) 0.019(4) 
N2B 0.064(5) 0.061(5) 0.049(5) -0.014(4) 0.020(4) -0.021(5) 
O1 0.030(2) 0.040(2) 0.045(2) 0.0019(19) 0.0142(18) -0.0084(18) 
O2 0.0262(19) 0.049(2) 0.042(2) 0.0094(19) 0.0137(18) -0.0088(17) 
O3 0.032(2) 0.050(2) 0.048(2) 0.002(2) 0.0239(19) 0.0099(18) 
O4 0.045(2) 0.038(2) 0.062(3) 0.008(2) 0.034(2) 0.012(2) 
O5 0.036(2) 0.049(2) 0.039(2) 0.021(2) 0.013(2) 0.005(2) 
Zn1 0.0197(5) 0.0276(5) 0.0319(5) 0.0077(2) 0.0140(4) 0.00156(19) 
C26B 0.097(7) 0.096(7) 0.095(7) 0.004(6) 0.041(6) 0.002(6) 
C27B 0.088(7) 0.070(6) 0.088(7) -0.011(5) 0.024(5) 0.003(5) 
C28B 0.052(6) 0.059(6) 0.053(6) -0.003(5) 0.023(5) -0.010(5) 
N2A 0.064(5) 0.061(5) 0.049(5) -0.014(4) 0.020(4) -0.021(5) 
C28A 0.052(6) 0.059(6) 0.053(6) -0.003(5) 0.023(5) -0.010(5) 
O6A 0.080(6) 0.052(4) 0.109(8) -0.014(5) 0.033(6) -0.005(5) 
C27A 0.088(7) 0.070(6) 0.088(7) -0.011(5) 0.024(5) 0.003(5) 
C26A 0.097(7) 0.096(7) 0.095(7) 0.004(6) 0.041(6) 0.002(6) 
 
_geom_special_details 
; 
 All esds (except the esd in the dihedral angle between two l.s. planes) 
 are estimated using the full covariance matrix.  The cell esds are taken 
 into account individually in the estimation of esds in distances, angles 
 and torsion angles; correlations between esds in cell parameters are only 
 used when they are defined by crystal symmetry.  An approximate (isotropic) 
 treatment of cell esds is used for estimating esds involving l.s. planes. 
; 
 
loop_ 
 _geom_bond_atom_site_label_1 
 _geom_bond_atom_site_label_2 
 _geom_bond_distance 
 _geom_bond_site_symmetry_2 
 _geom_bond_publ_flag 
C1 O2 1.244(7) . ? 
C1 O1 1.254(7) . ? 
C1 C2 1.514(7) . ? 
C2 C3 1.372(8) . ? 
C2 C7 1.420(7) . ? 
C3 C4 1.409(8) . ? 
C3 H3 0.9300 . ? 
C4 C5 1.371(9) . ? 
C4 H4 0.9300 . ? 
C5 C6 1.398(8) . ? 
C5 H5 0.9300 . ? 
C6 C7 1.393(7) . ? 
C6 C19 1.475(8) . ? 
C7 H7 0.9300 . ? 
C8 C9 1.396(9) . ? 
C8 C13 1.407(8) . ? 
C8 C17 1.490(8) . ? 
C9 C10 1.400(10) . ? 
C9 H9 0.9300 . ? 
C10 C11 1.374(10) . ? 
C10 H10 0.9300 . ? 
C11 C12 1.415(9) . ? 
C11 H11 0.9300 . ? 
C12 C13 1.385(8) . ? 
C12 C14 1.508(8) . ? 
C13 H13 0.9300 . ? 
C14 O3 1.240(8) . ? 
C14 O4 1.262(8) . ? 
C15 C22 1.371(8) 3_676 ? 
C15 C16 1.426(7) . ? 
C15 H15 0.9300 . ? 
C16 C21 1.416(8) . ? 
C16 C17 1.435(7) . ? 
C17 C18 1.377(8) . ? 
C18 C19 1.401(8) . ? 
C18 H18 0.9300 . ? 
C19 C20 1.418(7) . ? 
C20 C21 1.410(7) . ? 
C20 C22 1.440(8) . ? 
C21 C21 1.459(9) 3_676 ? 
C22 C15 1.371(8) 3_676 ? 
C22 H22 0.9300 . ? 
C23 N1 1.424(8) . ? 
C23 H23A 0.9600 . ? 
C23 H23B 0.9600 . ? 
C23 H23C 0.9600 . ? 
C24 N1 1.442(13) . ? 
C24 H24A 0.9602 . ? 
C24 H24B 0.9598 . ? 
C24 H24C 0.9600 . ? 
C25 O5 1.191(10) . ? 
C25 N1 1.300(10) . ? 
C25 H25 0.9299 . ? 
O6B C28B 1.180(9) . ? 
N2B C28B 1.407(8) . ? 
N2B C27B 1.435(9) . ? 
N2B C26B 1.443(9) . ? 
O1 Zn1 2.037(4) . ? 
O2 Zn1 2.026(4) 3_566 ? 
O3 Zn1 2.037(4) 1_565 ? 
O4 Zn1 2.045(4) 3_576 ? 
O5 Zn1 1.987(4) . ? 
Zn1 O2 2.026(4) 3_566 ? 
Zn1 O3 2.037(4) 1_545 ? 
Zn1 O4 2.045(4) 3_576 ? 
Zn1 Zn1 2.9318(13) 3_566 ? 
C26B H26D 0.9598 . ? 
C26B H26E 0.9600 . ? 
C26B H26F 0.9601 . ? 
C27B H27D 0.9599 . ? 
C27B H27E 0.9602 . ? 
C27B H27F 0.9600 . ? 
C28B H28B 0.9300 . ? 
N2A C28A 1.413(9) . ? 
N2A C27A 1.435(9) . ? 
N2A C26A 1.445(9) . ? 
C28A O6A 1.202(9) . ? 
C28A H28A 0.9299 . ? 
C27A H27A 0.9602 . ? 
C27A H27B 0.9601 . ? 
C27A H27C 0.9600 . ? 
C26A H26A 0.9599 . ? 
C26A H26B 0.9600 . ? 
C26A H26C 0.9600 . ? 
 
loop_ 
 _geom_angle_atom_site_label_1 
 _geom_angle_atom_site_label_2 
 _geom_angle_atom_site_label_3 
 _geom_angle 
 _geom_angle_site_symmetry_1 
 _geom_angle_site_symmetry_3 
 _geom_angle_publ_flag 
O2 C1 O1 126.3(5) . . ? 
O2 C1 C2 117.7(5) . . ? 
O1 C1 C2 116.0(5) . . ? 
C3 C2 C7 120.0(5) . . ? 
C3 C2 C1 120.6(5) . . ? 
C7 C2 C1 119.4(5) . . ? 
C2 C3 C4 119.7(5) . . ? 
C2 C3 H3 120.2 . . ? 
C4 C3 H3 120.2 . . ? 
C5 C4 C3 119.6(5) . . ? 
C5 C4 H4 120.2 . . ? 
C3 C4 H4 120.2 . . ? 
C4 C5 C6 122.4(5) . . ? 
C4 C5 H5 118.8 . . ? 
C6 C5 H5 118.8 . . ? 
C7 C6 C5 117.7(5) . . ? 
C7 C6 C19 121.3(5) . . ? 
C5 C6 C19 121.0(5) . . ? 
C6 C7 C2 120.5(5) . . ? 
C6 C7 H7 119.7 . . ? 
C2 C7 H7 119.7 . . ? 
C9 C8 C13 118.5(5) . . ? 
C9 C8 C17 121.0(5) . . ? 
C13 C8 C17 120.4(5) . . ? 
C8 C9 C10 120.8(5) . . ? 
C8 C9 H9 119.6 . . ? 
C10 C9 H9 119.6 . . ? 
C11 C10 C9 120.5(6) . . ? 
C11 C10 H10 119.7 . . ? 
C9 C10 H10 119.7 . . ? 
C10 C11 C12 119.3(6) . . ? 
C10 C11 H11 120.3 . . ? 
C12 C11 H11 120.3 . . ? 
C13 C12 C11 120.3(5) . . ? 
C13 C12 C14 120.0(5) . . ? 
C11 C12 C14 119.7(5) . . ? 
C12 C13 C8 120.5(6) . . ? 
C12 C13 H13 119.7 . . ? 
C8 C13 H13 119.7 . . ? 
O3 C14 O4 127.0(5) . . ? 
O3 C14 C12 117.9(5) . . ? 
O4 C14 C12 115.1(5) . . ? 
C22 C15 C16 121.0(5) 3_676 . ? 
C22 C15 H15 119.5 3_676 . ? 
C16 C15 H15 119.5 . . ? 
C21 C16 C15 119.0(4) . . ? 
C21 C16 C17 118.3(5) . . ? 
C15 C16 C17 122.7(5) . . ? 
C18 C17 C16 119.0(5) . . ? 
C18 C17 C8 119.4(5) . . ? 
C16 C17 C8 121.5(5) . . ? 
C17 C18 C19 123.4(5) . . ? 
C17 C18 H18 118.3 . . ? 
C19 C18 H18 118.3 . . ? 
C18 C19 C20 117.6(5) . . ? 
C18 C19 C6 120.3(5) . . ? 
C20 C19 C6 122.1(5) . . ? 
C21 C20 C19 120.2(5) . . ? 
C21 C20 C22 118.8(4) . . ? 
C19 C20 C22 121.0(5) . . ? 
C20 C21 C16 120.8(4) . . ? 
C20 C21 C21 119.2(6) . 3_676 ? 
C16 C21 C21 120.0(6) . 3_676 ? 
C15 C22 C20 121.4(5) 3_676 . ? 
C15 C22 H22 119.3 3_676 . ? 
C20 C22 H22 119.3 . . ? 
N1 C23 H23A 108.9 . . ? 
N1 C23 H23B 111.5 . . ? 
H23A C23 H23B 109.5 . . ? 
N1 C23 H23C 108.0 . . ? 
H23A C23 H23C 109.5 . . ? 
H23B C23 H23C 109.5 . . ? 
N1 C24 H24A 110.0 . . ? 
N1 C24 H24B 109.3 . . ? 
H24A C24 H24B 109.4 . . ? 
N1 C24 H24C 109.1 . . ? 
H24A C24 H24C 109.5 . . ? 
H24B C24 H24C 109.5 . . ? 
O5 C25 N1 126.4(9) . . ? 
O5 C25 H25 116.8 . . ? 
N1 C25 H25 116.8 . . ? 
C25 N1 C23 120.9(9) . . ? 
C25 N1 C24 123.1(8) . . ? 
C23 N1 C24 116.0(8) . . ? 
C28B N2B C27B 122.4(11) . . ? 
C28B N2B C26B 119.9(11) . . ? 
C27B N2B C26B 117.6(13) . . ? 
C1 O1 Zn1 128.7(4) . . ? 
C1 O2 Zn1 124.7(4) . 3_566 ? 
C14 O3 Zn1 122.6(4) . 1_565 ? 
C14 O4 Zn1 129.7(4) . 3_576 ? 
C25 O5 Zn1 120.4(5) . . ? 
O5 Zn1 O2 102.18(18) . 3_566 ? 
O5 Zn1 O3 103.12(19) . 1_545 ? 
O2 Zn1 O3 91.96(19) 3_566 1_545 ? 
O5 Zn1 O1 97.45(18) . . ? 
O2 Zn1 O1 159.95(18) 3_566 . ? 
O3 Zn1 O1 87.53(18) 1_545 . ? 
O5 Zn1 O4 96.29(19) . 3_576 ? 
O2 Zn1 O4 87.05(19) 3_566 3_576 ? 
O3 Zn1 O4 160.32(18) 1_545 3_576 ? 
O1 Zn1 O4 86.75(19) . 3_576 ? 
O5 Zn1 Zn1 172.16(15) . 3_566 ? 
O2 Zn1 Zn1 81.87(12) 3_566 3_566 ? 
O3 Zn1 Zn1 83.31(13) 1_545 3_566 ? 
O1 Zn1 Zn1 78.16(12) . 3_566 ? 
O4 Zn1 Zn1 77.09(13) 3_576 3_566 ? 
N2B C26B H26D 109.2 . . ? 
N2B C26B H26E 109.6 . . ? 
H26D C26B H26E 109.5 . . ? 
N2B C26B H26F 109.6 . . ? 
H26D C26B H26F 109.5 . . ? 
H26E C26B H26F 109.5 . . ? 
N2B C27B H27D 113.4 . . ? 
N2B C27B H27E 106.3 . . ? 
H27D C27B H27E 109.5 . . ? 
N2B C27B H27F 108.6 . . ? 
H27D C27B H27F 109.5 . . ? 
H27E C27B H27F 109.5 . . ? 
O6B C28B N2B 122.3(11) . . ? 
O6B C28B H28B 118.8 . . ? 
N2B C28B H28B 118.9 . . ? 
C28A N2A C27A 120.0(12) . . ? 
C28A N2A C26A 118.5(12) . . ? 
C27A N2A C26A 121.1(15) . . ? 
O6A C28A N2A 120.2(12) . . ? 
O6A C28A H28A 120.1 . . ? 
N2A C28A H28A 119.8 . . ? 
N2A C27A H27A 109.8 . . ? 
N2A C27A H27B 109.9 . . ? 
H27A C27A H27B 109.5 . . ? 
N2A C27A H27C 108.7 . . ? 
H27A C27A H27C 109.5 . . ? 
H27B C27A H27C 109.5 . . ? 
N2A C26A H26A 109.2 . . ? 
N2A C26A H26B 108.9 . . ? 
H26A C26A H26B 109.5 . . ? 
N2A C26A H26C 110.2 . . ? 
H26A C26A H26C 109.5 . . ? 
H26B C26A H26C 109.5 . . ? 
 
_diffrn_measured_fraction_theta_max    0.991 
_diffrn_reflns_theta_full              25.00 
_diffrn_measured_fraction_theta_full   0.991 
_refine_diff_density_max    2.062 
_refine_diff_density_min   -0.714 
_refine_diff_density_rms    0.200 
